# Supplementary material
Source: ML conference proceedings conference paper supplement (https://proceedings.mlr.press/v103/fink19a.html)
Supplement: Supplementary file [file fink19a-supp.pdf]

# SIPTA-Community based on Paper Contributions – Supplementary Material

**Paul Fink**  
Munich, Germany

STATISTICS.PF@MAILBOX.ORG

## Abstract

This document is the supplementary material to the proceedings contribution “SIPTA-Community based on Paper Contributions”. It contains additional graphics and the number assignment of authors and locations.

## 1. Additional Graphics

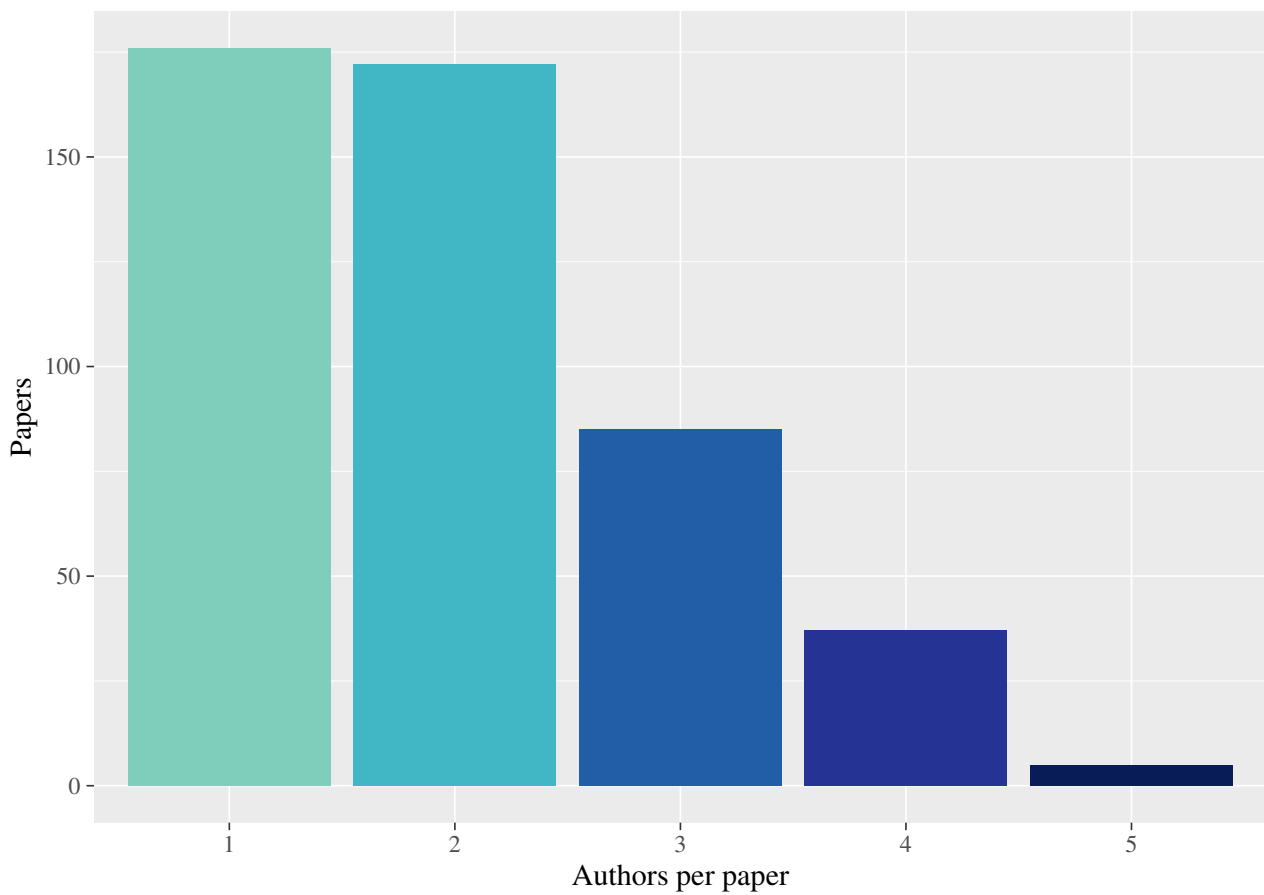

Figure 1: Overall absolute frequencies of authors per paper

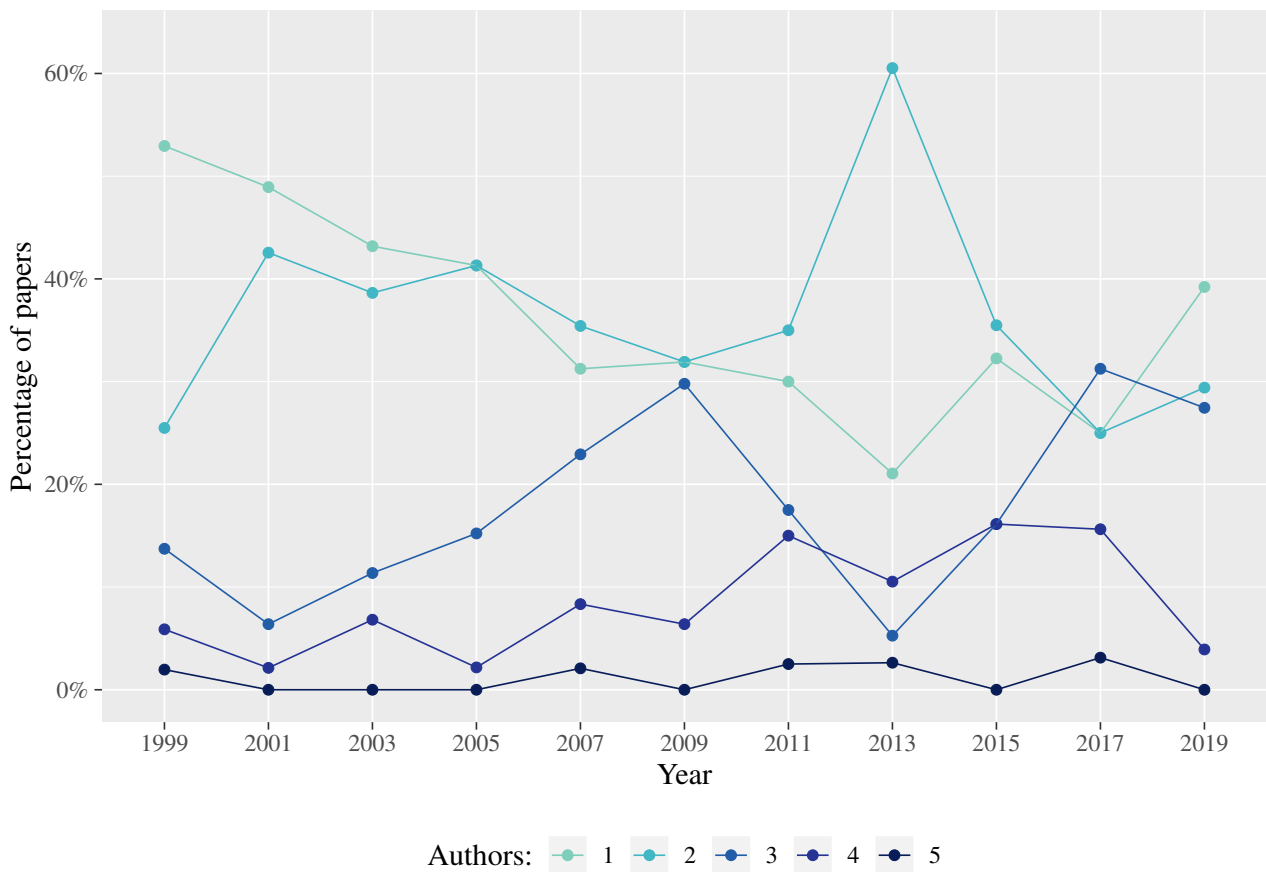

Figure 2: Number of authors per paper by conference in percentage of all papers at each individual conference proceedings

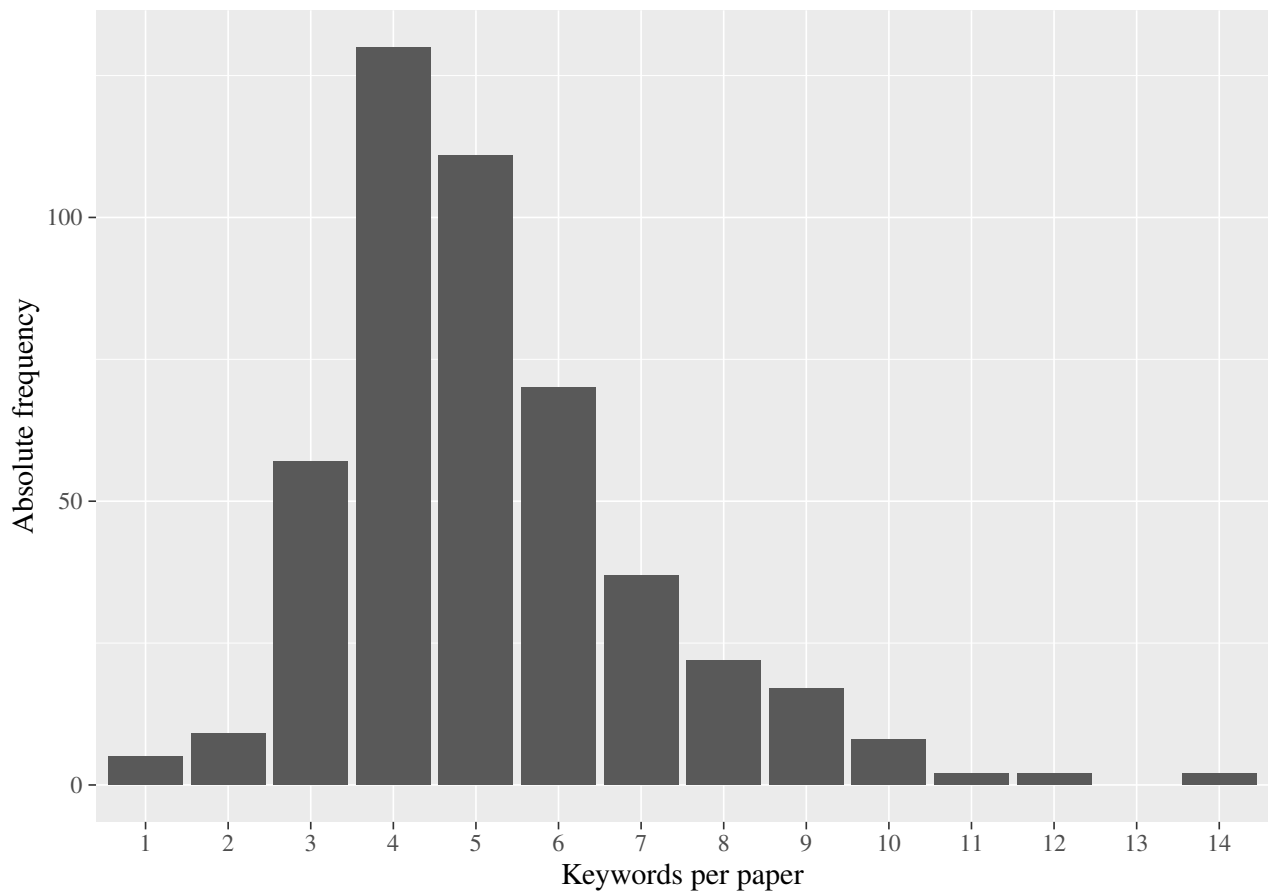

Figure 3: Keywords per paper

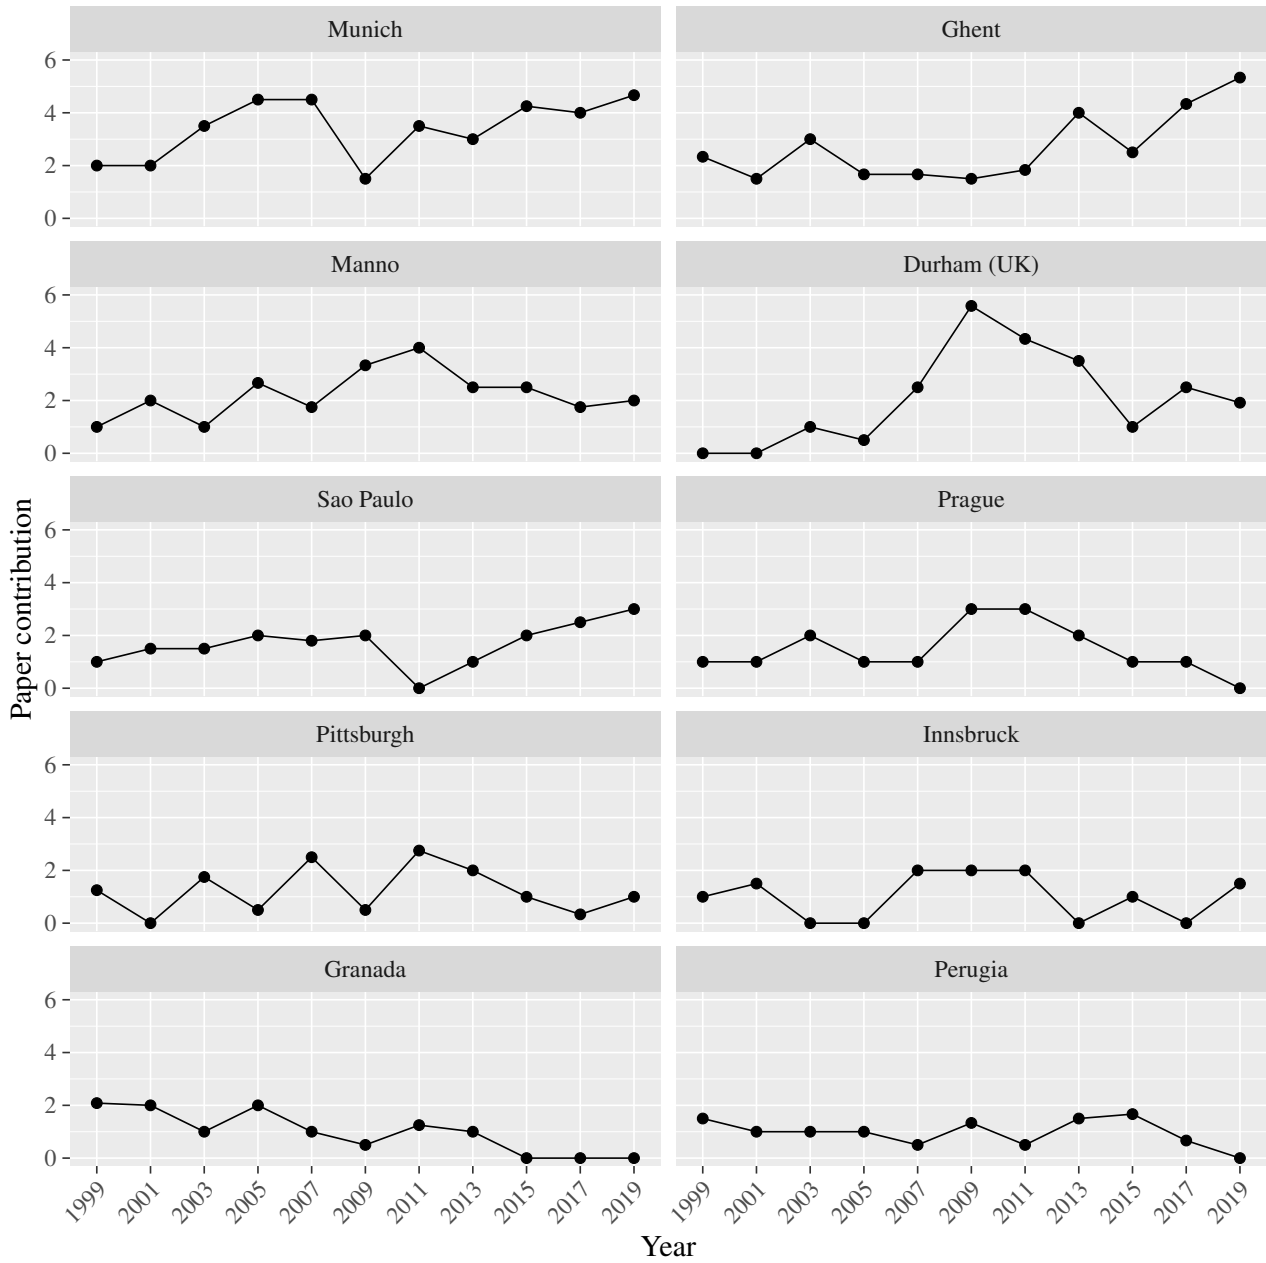

Figure 4: Paper contribution per city of authors and conference

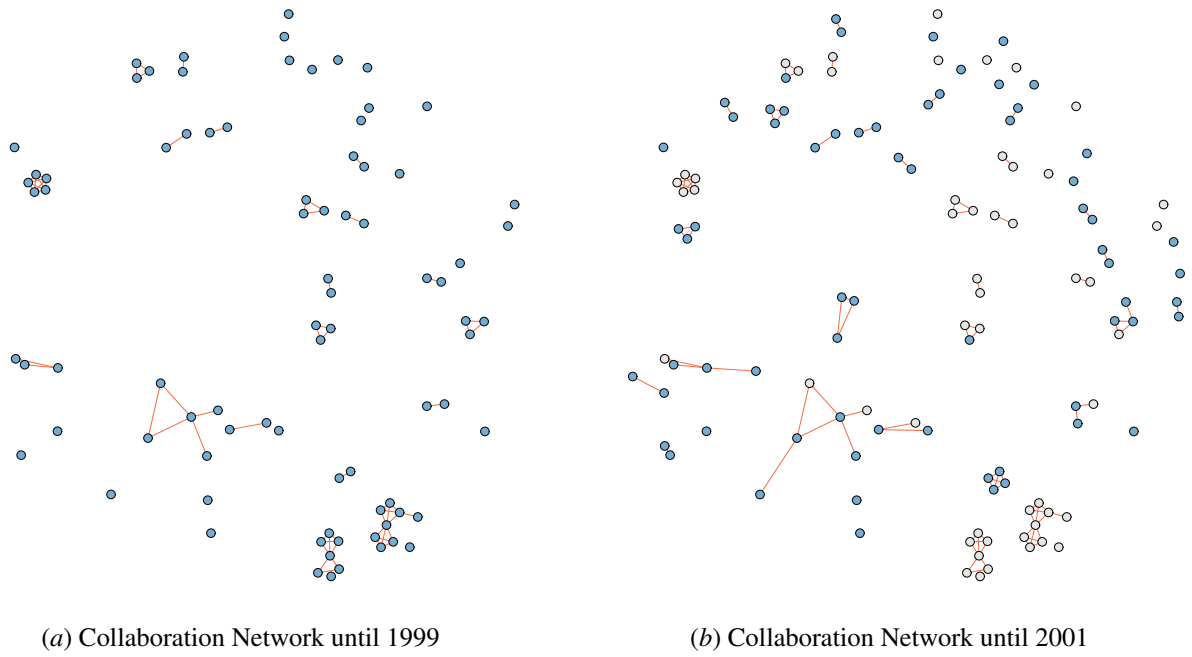

Figure 5: Collaboration Network until 2019

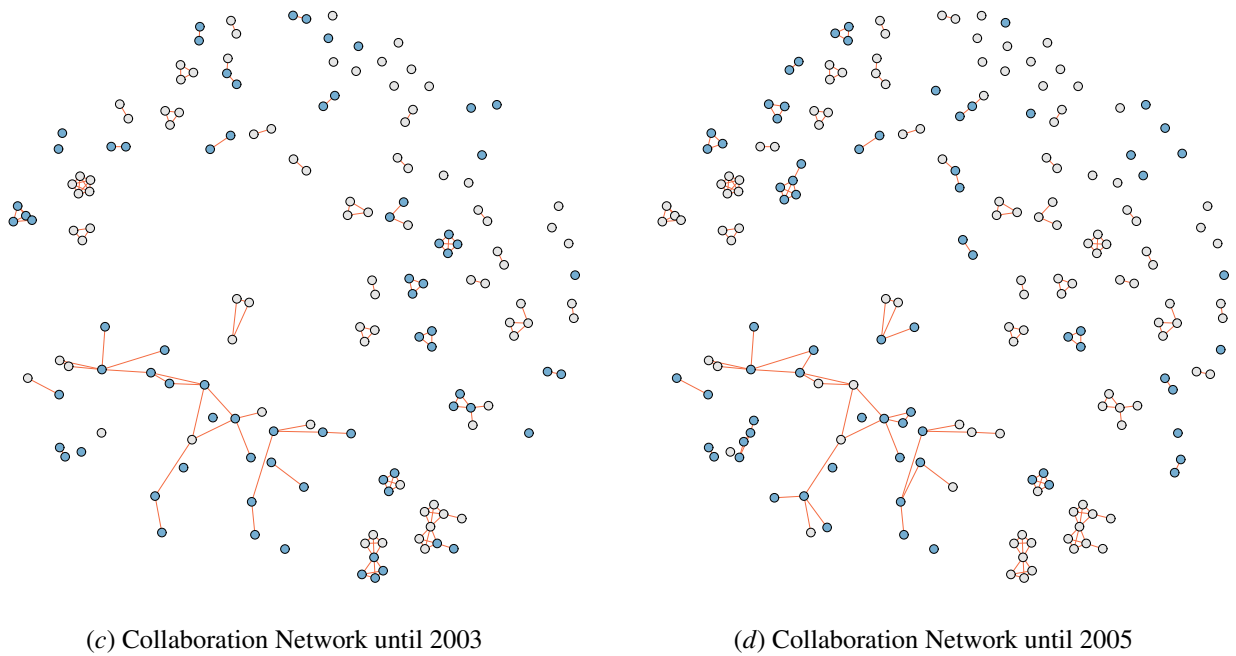

Figure 5: Collaboration Network until 2019

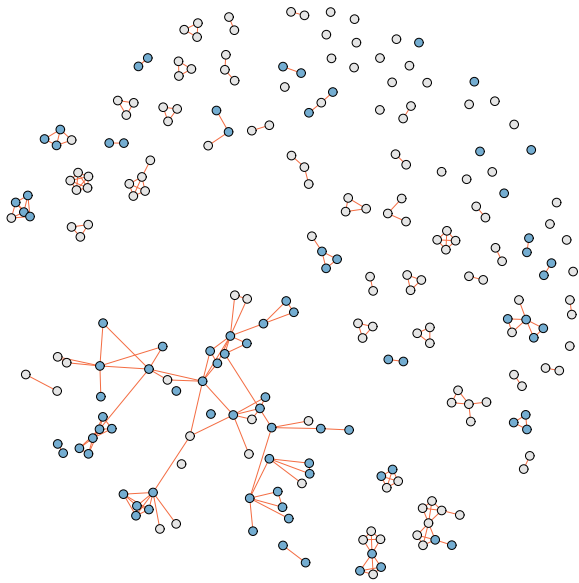

(e) Collaboration Network until 2007

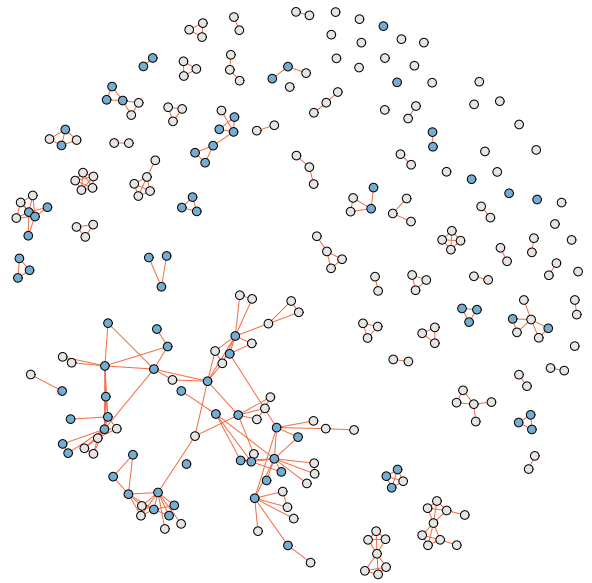

(f) Collaboration Network until 2009

Figure 5: Collaboration Network until 2019

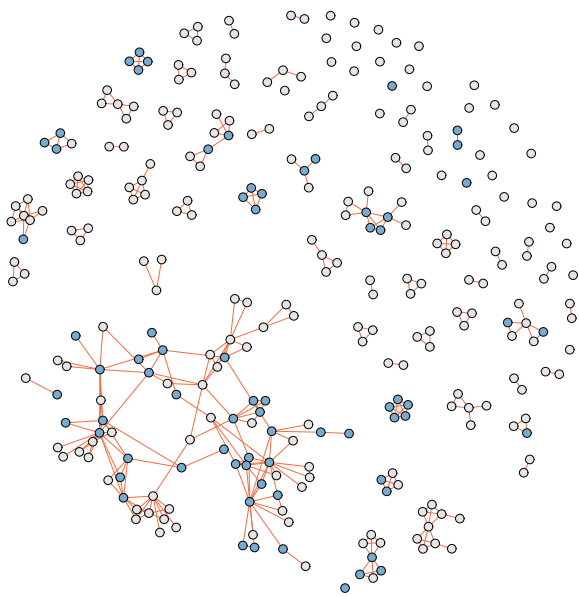

(g) Collaboration Network until 2011

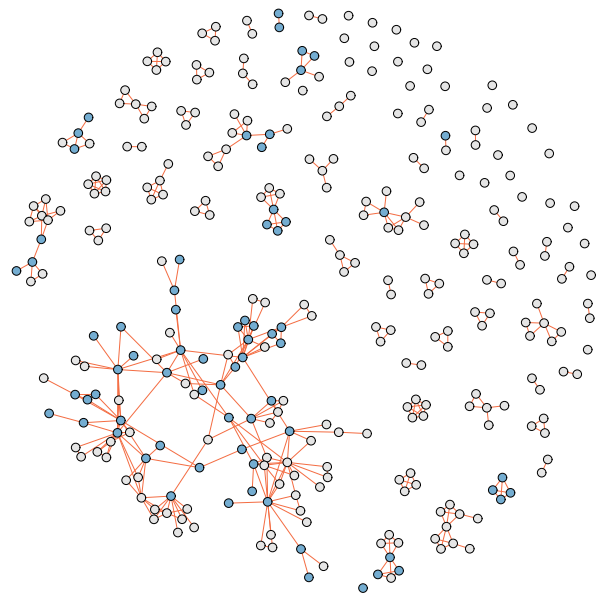

(h) Collaboration Network until 2013

Figure 5: Collaboration Network until 2019

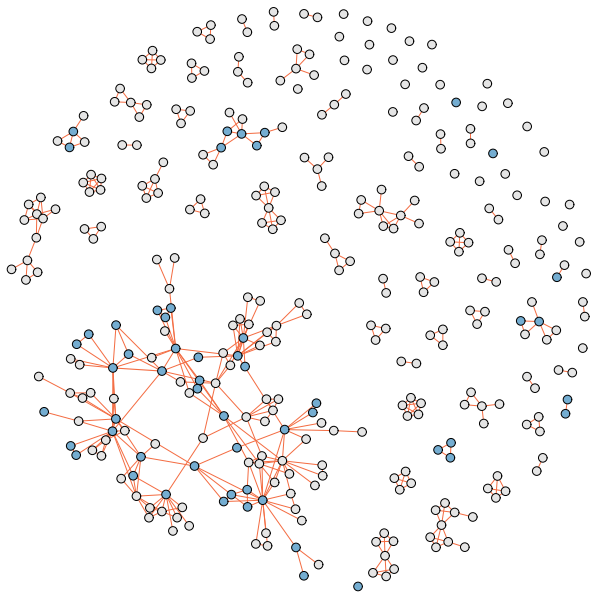

(i) Collaboration Network until 2015

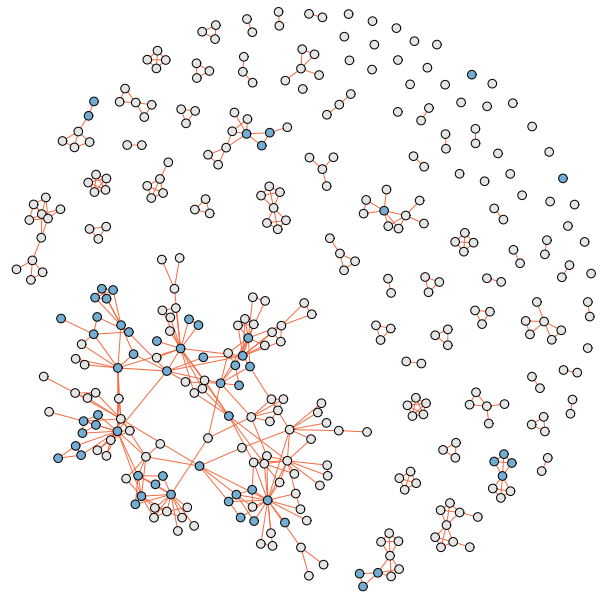

(j) Collaboration Network until 2017

Figure 5: Collaboration Network until 2019

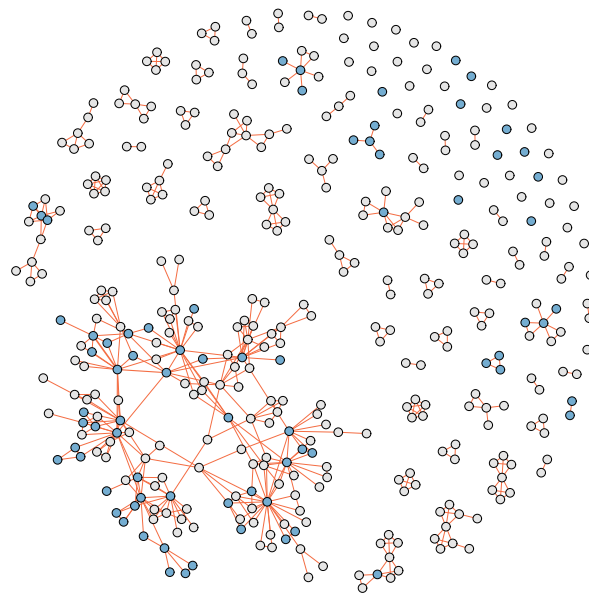

(k) Collaboration Network until 2019

Figure 5: Collaboration Network until 2019

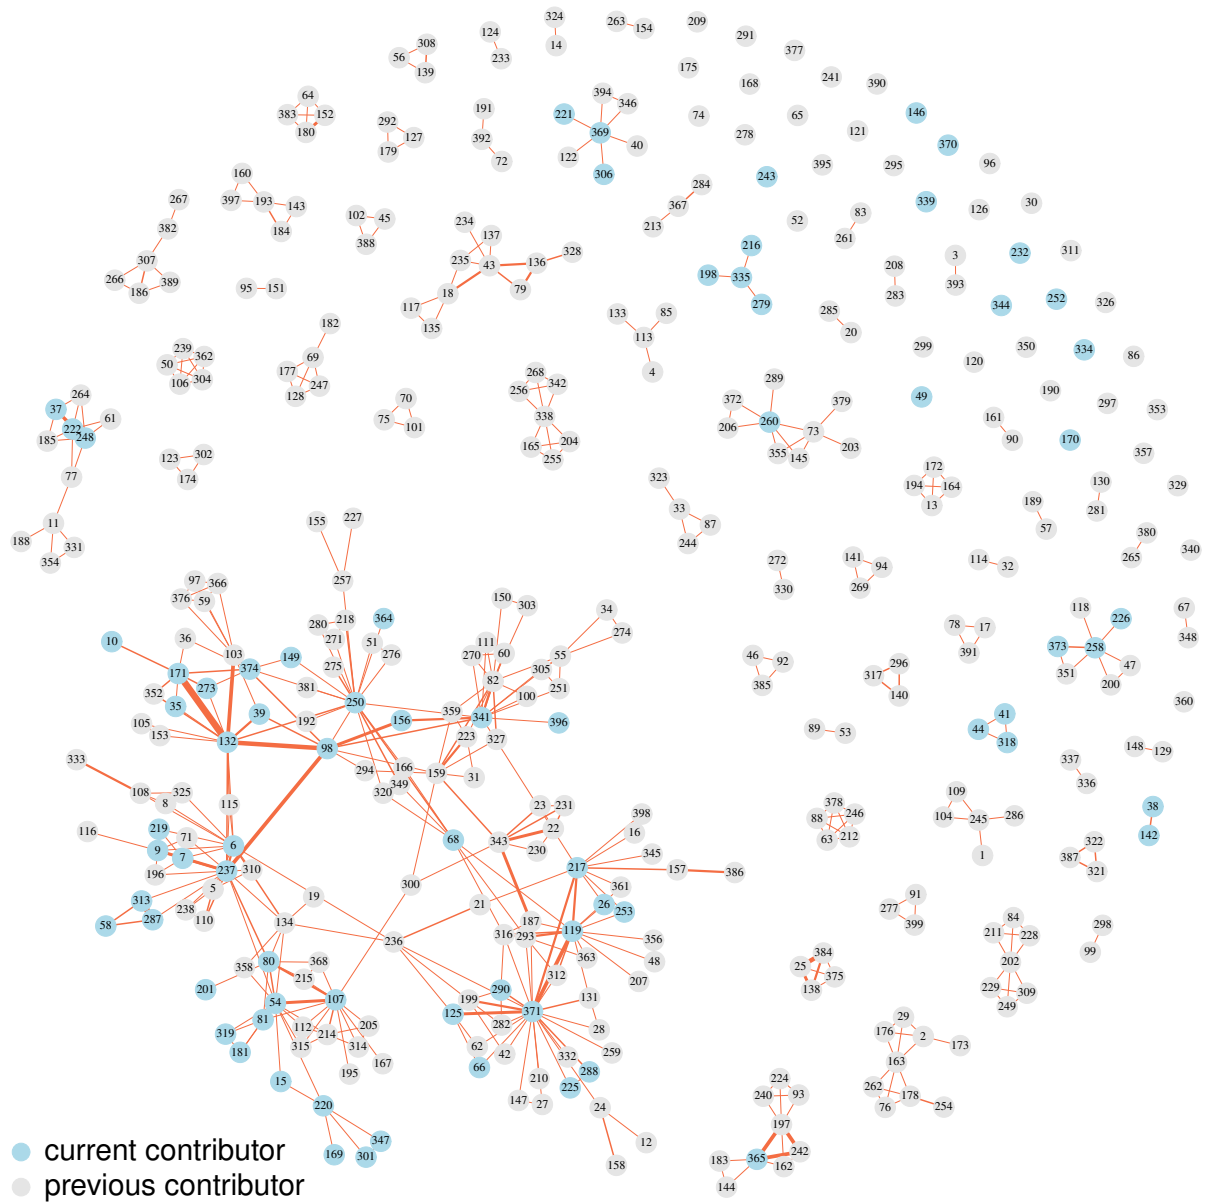

Figure 6: Complete collaboration network until 2017 (magnified version)



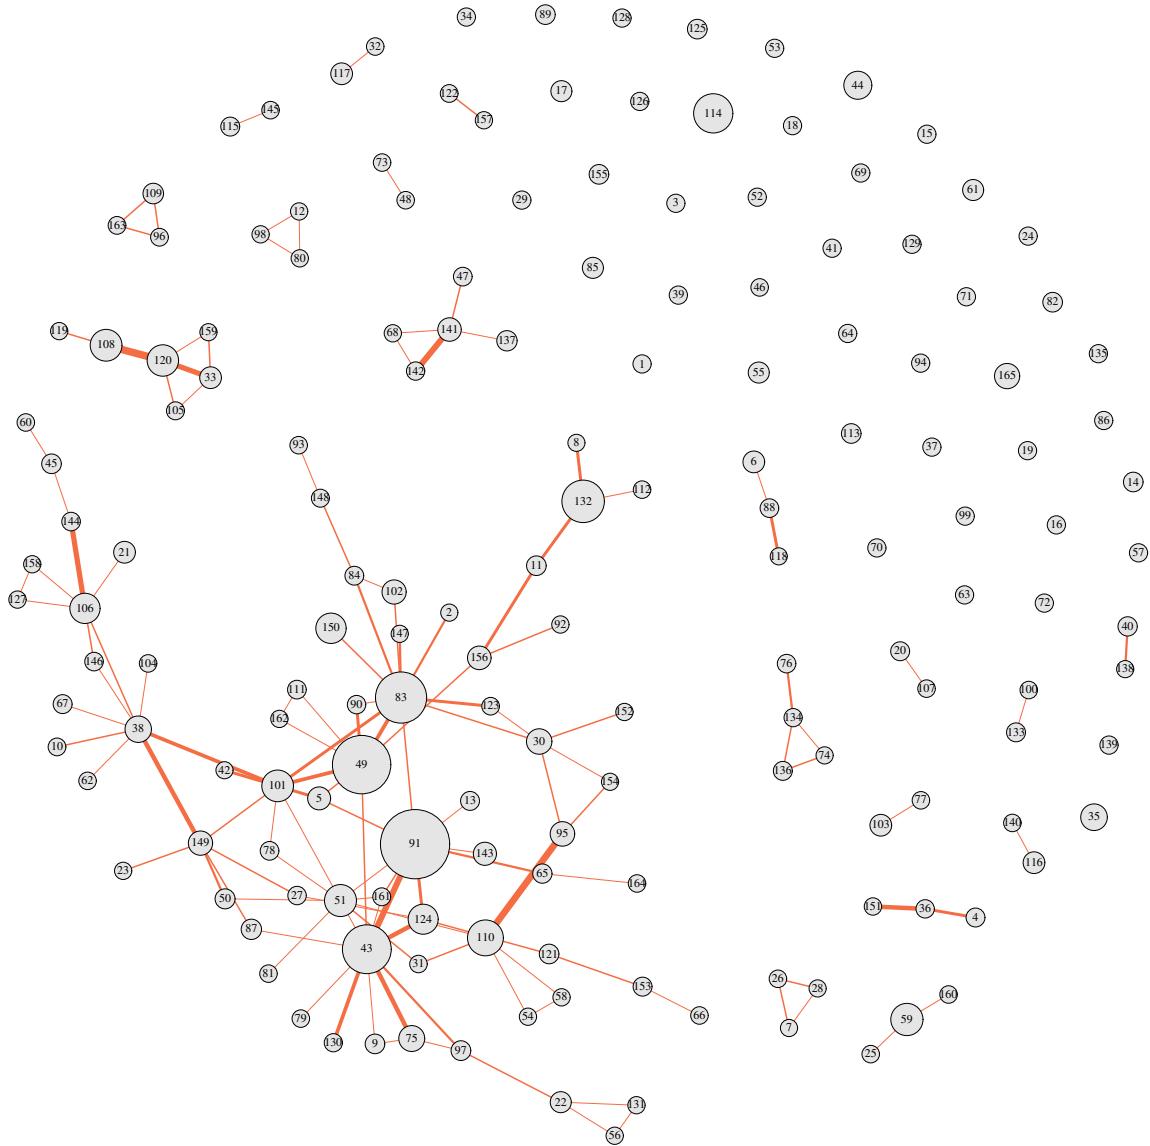

Figure 7: Complete collaboration network on level of authors' affiliated location (magnified version)

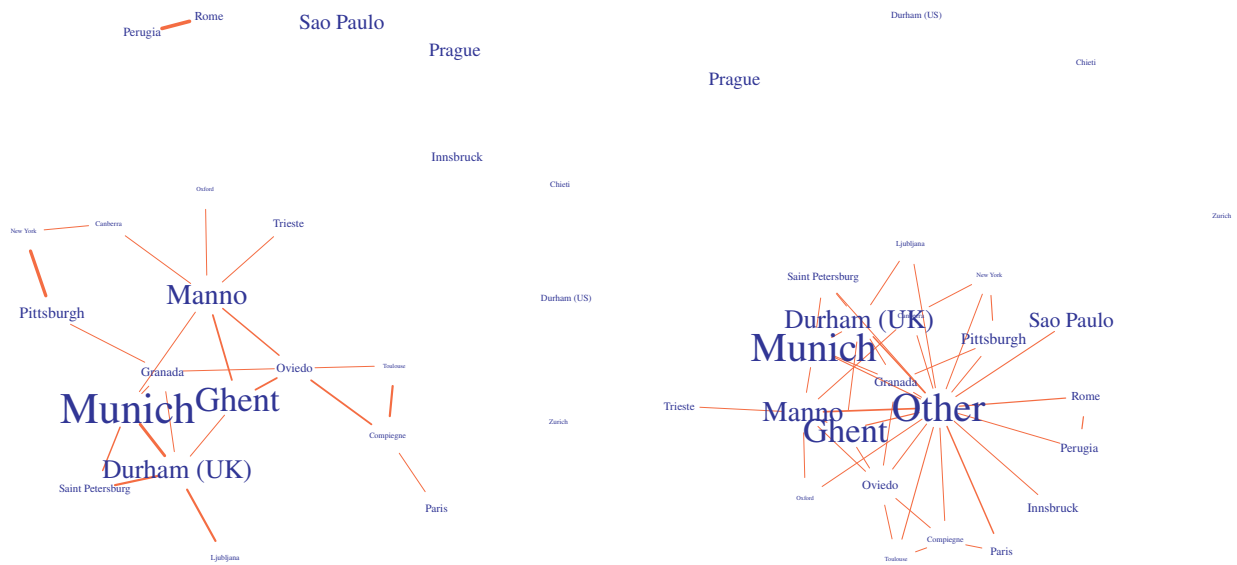

(a) Cities with a contribution count of less than 5 are omitted. (b) Cities with a contribution count of less than 5 are subsumed under city *Other*. The font size for *Other* was slightly reduced for visual and placement reasons.

Figure 8: Collaborations between authors' affiliated cities. The font size is proportional to the paper contribution of the city.

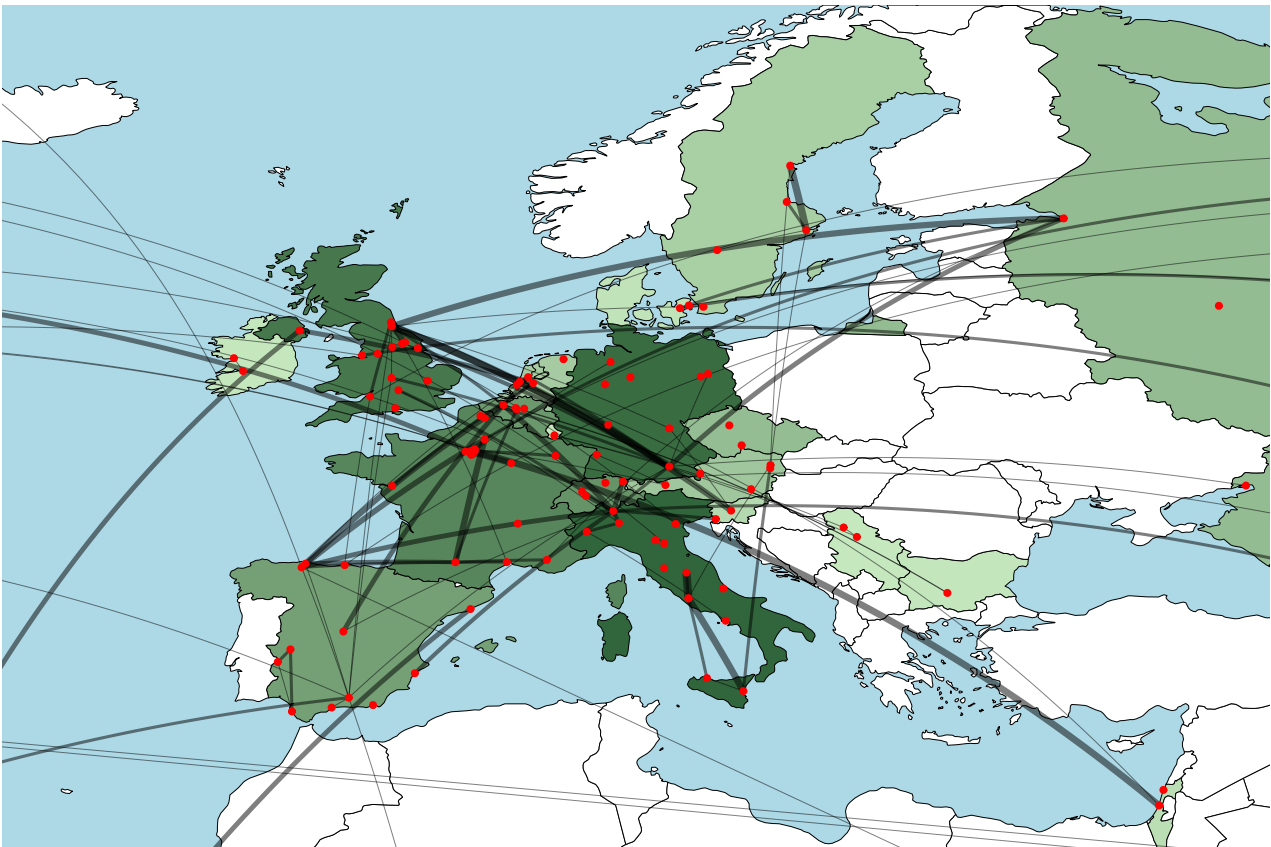

Figure 9: Collaboration network clipped to Europe: A darker colour indicates more contributions, authors' locations are red dots and collaborations are marked by lines (the thicker the line, the more collaborations).

## 2. Additional Tables

Table 1: Keywords attached to at least 10 different papers

| Keywords                                                                          | Paper count |
|-----------------------------------------------------------------------------------|-------------|
| imprecise probability                                                             | 89          |
| coherence                                                                         | 34          |
| belief function                                                                   | 29          |
| credal set, natural extension                                                     | 25          |
| random set                                                                        | 23          |
| credal network                                                                    | 19          |
| imprecise dirichlet model, uncertainty                                            | 18          |
| classification, lower prevision                                                   | 15          |
| interval probability                                                              | 14          |
| coherent lower prevision, conditioning, epistemic irrelevance, linear programming | 12          |
| ambiguity, conditional independence, decision making, robustness                  | 11          |

Table 2: Authors with most overall contributions

| Author name                                                 | Contribution count |
|-------------------------------------------------------------|--------------------|
| Gert de Cooman, Thomas Augustin                             | 26                 |
| Marco Zaffalon                                              | 21                 |
| Fabio Cozman, Matthias Troffaes                             | 19                 |
| Enrique Miranda                                             | 16                 |
| Jasper de Bock, Lev Utkin                                   | 14                 |
| Frank Coolen                                                | 13                 |
| Serafin Moral                                               | 12                 |
| Barbara Vantaggi                                            | 11                 |
| Sebastien Destercke                                         | 10                 |
| Damjan Skulj, Jirina Vejnarova, Marco Cattaneo, Paolo Vicig | 9                  |

Table 3: Authors with at least seven coauthors

| Author Name                                                                            | Coauthor count |
|----------------------------------------------------------------------------------------|----------------|
| Thomas Augustin                                                                        | 24             |
| Matthias Troffaes                                                                      | 19             |
| Marco Zaffalon                                                                         | 17             |
| Frank Coolen                                                                           | 15             |
| Alessandro Antonucci, Cassio Campos, Fabio Cozman, Gert de Cooman, Sebastien Destercke | 13             |
| Didier Dubois                                                                          | 12             |
| Lev Utkin                                                                              | 11             |
| Enrique Miranda, Ines Couso                                                            | 9              |
| Denis Maua                                                                             | 8              |
| Damjan Skulj, Erik Quaeghebeur, Giorgio Corani, Jasper de Bock, Serafin Moral          | 7              |

Table 4: IDs of authors in the collaboration network

| Name                      | ID  | Name                        | ID    | Name                          | ID  |
|---------------------------|-----|-----------------------------|-------|-------------------------------|-----|
| Adriana Castaldo          | 1   | Alain Chateaneuf            | 2     | Alain Vandal                  | 3   |
| Alane Alves Silva         | 4   | Alberto Piatti              | 5     | Alessandro Antonucci          | 6   |
| Alessandro Facchini       | 7   | Alessandro Giusti           | 8     | Alessio Benavoli              | 9   |
| Alexander Erreygers       | 10  | Alexander Karlsson          | 11    | Alexander Lepskiy             | 12  |
| Alfonso Suarez            | 13  | Alice Cicirello             | 14    | Alvaro Henrique Chaim Correia | 15  |
| Anatoly Chekh             | 16  | Anbu Yue                    | 17    | Andrea Capotorti              | 18  |
| Andrea Mignatti           | 19  | Andrea Sgarro               | 20    | Andrea Wiencierz              | 21  |
| Andres Cano               | 22  | Andres Masegosa             | 23    | Andrew Bronevich              | 24  |
| Angelo Gilio              | 25  | Anna Meldo                  | 26    | Anne Kunz                     | 27  |
| Annette Peters            | 28  | Antoine Billot              | 29    | Anton Wallner                 | 30  |
| Antonio Alvarez-Caballero | 31  | Antonio Salmeron            | 32    | Arkadii Slinko                | 33  |
| Arnaud Helias             | 34  | Arne Decadt                 | 35    | Arno Siebes                   | 36  |
| Aron Larsson              | 37  | Arthur Paul Pedersen        | 38    | Arthur van Camp               | 39  |
| Astride Aregui            | 40  | Atefeh Keshavarzi farghandi | Za-41 | Aziz Omar                     | 42  |
| Barbara Vantaggi          | 43  | Bart Verheij                | 44    | Bernard Bobee                 | 45  |
| Bernard De Baets          | 46  | Bernhard Schmelzer          | 47    | Brett Houlding                | 48  |
| Brian Hill                | 49  | Brigitte Jaumard            | 50    | Camila Caiado                 | 51  |
| Carolin Strobl            | 52  | Caroline Lynch              | 53    | Cassio Campos                 | 54  |
| Cedric Baudrit            | 55  | Charles Geyer               | 56    | Charles Manski                | 57  |
| Chiara Corsato            | 58  | Chris Wesseling             | 59    | Christelle Jacob              | 60  |
| Christofer Waldenstrom    | 61  | Christoph Jansen            | 62    | Christophe Berenguer          | 63  |
| Cleotilde Gonzalez        | 64  | Cliff Joslyn                | 65    | Cornelia Fuetterer            | 66  |
| Costanza Torricelli       | 67  | Damjan Skulj                | 68    | Dan Berleant                  | 69  |
| Daniel Jolly              | 70  | Dario Piga                  | 71    | Darryl Morrell                | 72  |
| David Budescu             | 73  | David Harmanec              | 74    | David Mercier                 | 75  |
| David Schmeidler          | 76  | David Sundgren              | 77    | David Timson                  | 78  |
| Davide Petturiti          | 79  | Denis Maua                  | 80    | Diarmaid Conaty               | 81  |
| Didier Dubois             | 82  | Dieter Denneberg            | 83    | Dilip Sarkar                  | 84  |
| Diogo Bezerra             | 85  | Dionissi Aliprantis         | 86    | Dominic Searles               | 87  |
| Dominique Vasseur         | 88  | Don Barry                   | 89    | Donald Bamber                 | 90  |
| Dragan Doder              | 91  | Elena Tsiporkova            | 92    | Elias Moreno                  | 93  |
| Elizabeth Casman          | 94  | Elmar Kriegler              | 95    | Emad Saad                     | 96  |
| Emma Beauxis-Aussalet     | 97  | Enrique Miranda             | 98    | Eran Hanany                   | 99  |
| Eric Chojnacki            | 100 | Eric Lefevre                | 101   | Eric Parent                   | 102 |
| Erik Quaeghebeur          | 103 | Erio Castagnoli             | 104   | Etienne E. Kerre              | 105 |
| Fabien Chauny             | 106 | Fabio Cozman                | 107   | Fabio Cuzzolin                | 108 |
| Fabio Maccheroni          | 109 | Fabio Trojani               | 110   | Felipe Aguirre                | 111 |
| Felipe Trevizan           | 112 | Fernando Campello de Souza  | 113   | Fernando Reche                | 114 |
| Filip Hermans             | 115 | Francesca Mangili           | 116   | Francesca Vattari             | 117 |
| Francesco Russo           | 118 | Frank Coolen                | 119   | Frank Hampel                  | 120 |
| Frans Voorbraak           | 121 | Frederic Pichon             | 122   | Frederique Fournier           | 123 |
| Fulvio Fontini            | 124 | Georg Schollmeyer           | 125   | George Klir                   | 126 |
| George Wilmers            | 127 | Gerald Sheble               | 128   | Gerd Peschl                   | 129 |
| Gernot Kleiter            | 130 | Gero Walter                 | 131   | Gert de Cooman                | 132 |
| Gertrudes Nadler Lins     | 133 | Giorgio Corani              | 134   | Giuliana Regoli               | 135 |

Table 4: IDs of authors in the collaboration network (cont.)

| Name                      | ID  | Name                     | ID  | Name                       | ID  |
|---------------------------|-----|--------------------------|-----|----------------------------|-----|
| Giulianella Coletti       | 136 | Giuseppe Busanello       | 137 | Giuseppe Sanfilippo        | 138 |
| Glen Meeden               | 139 | Glenn Shafer             | 140 | Granger Morgan             | 141 |
| Gregory Wheeler           | 142 | Guangtao Fu              | 143 | Hailin Liu                 | 144 |
| Han-Hui Por               | 145 | Harry Crane              | 146 | Helmut Kuechenhoff         | 147 |
| Helmut Schweiger          | 148 | Henna Bains              | 149 | Henri Prade                | 150 |
| Hermann Held              | 151 | Horacio Arlo-Costa       | 152 | Hugo Janssen               | 153 |
| Huguette Reynaerts        | 154 | Ian Vernon               | 155 | Ignacio Montes             | 156 |
| Igor Kozine               | 157 | Igor Rozenberg           | 158 | Ines Couso                 | 159 |
| Ines Gonzalez-Rodriguez   | 160 | Irwin Goodman            | 161 | Isaac Levi                 | 162 |
| Itzhak Gilboa             | 163 | Jacinto Martin           | 164 | Jack Siegrist              | 165 |
| Jacob Gledhill            | 166 | Jaime Ide                | 167 | James Dickey               | 168 |
| Janneke Bolt              | 169 | Jason Konek              | 170 | Jasper de Bock             | 171 |
| Javier Hernandez          | 172 | Jean-Christophe Vergnaud | 173 | Jean-Jacques Royer         | 174 |
| Jean-Marc Bernard         | 175 | Jean-Marc Tallon         | 176 | Jean-Philippe Argaud       | 177 |
| Jean-Yves Jaffray         | 178 | Jeff Paris               | 179 | Jeffrey Helzner            | 180 |
| Jesus Martinez-del-Rincon | 181 | Jianzhong Zhang          | 182 | Jiji Zhang                 | 183 |
| Jim Hall                  | 184 | Jim Johansson            | 185 | Jirina Vejnarova           | 186 |
| Joaquin Abellan           | 187 | Joe Steinhauer           | 188 | Joel Horowitz              | 189 |
| Joerg Stoye               | 190 | John Kenney              | 191 | John Paul Gosling          | 192 |
| Jonathan Lawry            | 193 | Jose Arias               | 194 | Jose Rocha                 | 195 |
| Jose Vicente-Perez        | 196 | Joseph Kadane            | 197 | Joyce Cahoon               | 198 |
| Julia Plass               | 199 | Julian King              | 200 | Julissa Villanueva Llerena | 201 |
| Kamal Premaratne          | 202 | Karen Kramer             | 203 | Kari Sentz                 | 204 |
| Karina Delgado            | 205 | Kazuhisa Takemura        | 206 | Ke-Jian Yan                | 207 |
| Kevin Loquin              | 208 | Klaus Nehring            | 209 | Kurt Weichselberger        | 210 |
| Lalitha Polpitiya         | 211 | Laurence Dieulle         | 212 | Leandro Rego               | 213 |
| Leliane Barros            | 214 | Leliane de Barros        | 215 | Leonardo Cella             | 216 |
| Lev Utkin                 | 217 | Lewis Paton              | 218 | Lilith Mattei              | 219 |
| Linda van der Gaag        | 220 | Liyao Ma                 | 221 | Love Ekenberg              | 222 |
| Luciano Sanchez           | 223 | Luis Raul Pericchi       | 224 | Luisa Ebner                | 225 |
| Lukas Wurzer              | 226 | Malcolm Farrow           | 227 | Manohar Murthi             | 228 |
| Manohar N. Murthi         | 229 | Manuel Gomez             | 230 | Manuel Gomez-Olmedo        | 231 |
| Marc Fischer              | 232 | Marcello Basili          | 233 | Marcello Mastroleo         | 234 |
| Marco Baiocchi            | 235 | Marco Cattaneo           | 236 | Marco Zaffalon             | 237 |
| Marcus Hutter             | 238 | Marcus Poggi de Aragao   | 239 | Maria Eglee Perez          | 240 |
| Mark Ducey                | 241 | Mark Schervish           | 242 | Marshall Abrams            | 243 |
| Marston Conder            | 244 | Massimo Marinacci        | 245 | Mathieu Couplet            | 246 |
| Mathieu Dancre            | 247 | Mats Danielson           | 248 | Matthias Scheutz           | 249 |
| Matthias Troffaes         | 250 | Matthieu Hourbracq       | 251 | Max Nendel                 | 252 |
| Maxim Kovalev             | 253 | Meglana Jeleva           | 254 | Michael Balch              | 255 |
| Michael Beer              | 256 | Michael Goldstein        | 257 | Michael Oberguggenberger   | 258 |
| Michael Obermeier         | 259 | Michael Smithson         | 260 | Michel Grabisch            | 261 |
| Michele Cohen             | 262 | Michele Vanmaele         | 263 | Mikael Andersson           | 264 |
| Mikelis Bickis            | 265 | Milan Daniel             | 266 | Milan Studeny              | 267 |
| Mingqiang Zhang           | 268 | Minh Ha-Duong            | 269 | Mohamed Sallak             | 270 |
| Mohamud Hussein           | 271 | Morgane Cheve            | 272 | Natan T'Joens              | 273 |
| Nathalie Perrot           | 274 | Nathan Huntley           | 275 | Nawapon Nakharutai         | 276 |
| Nenad Savic               | 277 | Nic Wilson               | 278 | Nicholas Syring            | 279 |

Table 4: IDs of authors in the collaboration network (cont.)

| Name               | ID  | Name                     | ID  | Name                               | ID  |
|--------------------|-----|--------------------------|-----|------------------------------------|-----|
| Nigel Boatman      | 280 | Niki Pfeifer             | 281 | Norbert Schoening                  | 282 |
| Olivier Strauss    | 283 | Pablo Fierens            | 284 | Paola Castellan                    | 285 |
| Paolo Ghirardato   | 286 | Paolo Vicig              | 287 | Patrick Schwaferts                 | 288 |
| Paul Campbell      | 289 | Paul Fink                | 290 | Paul Snow                          | 291 |
| Paul Watton        | 292 | Pauline Coolen-Schrijner | 293 | Pedro Gil                          | 294 |
| Pei Wang           | 295 | Peter Gillett            | 296 | Peter Harremoes                    | 297 |
| Peter Klibanoff    | 298 | Peter Wakker             | 299 | Peter Walley                       | 300 |
| Philippe Leray     | 301 | Philippe Nivlet          | 302 | Philippe Smets                     | 303 |
| Pierre Hansen      | 304 | Pierre-Henri Wuillemain  | 305 | Prakash Shenoy                     | 306 |
| Radim Jirousek     | 307 | Radu Lazar               | 308 | Rafael Nunez                       | 309 |
| Ralph Bruehlmann   | 310 | Raphael Giraud           | 311 | Rebecca Baker                      | 312 |
| Renato Pelessoni   | 313 | Ricardo Shirota          | 314 | Ricardo Shirota Filho              | 315 |
| Richard Crossman   | 316 | Richard Scherl           | 317 | Rineke Verbrugge                   | 318 |
| Rob de Wit         | 319 | Robert Hable             | 320 | Robert Nau                         | 321 |
| Robert Winkler     | 322 | Robin Christian          | 323 | Robin Langley                      | 324 |
| Rocco De Rosa      | 325 | Rolf Haenni              | 326 | Romain Guillaume                   | 327 |
| Romano Scozzafava  | 328 | Ronald Yager             | 329 | Ronan Congar                       | 330 |
| Ronnie Johansson   | 331 | Rudolf Seising           | 332 | Ruggero Frezza                     | 333 |
| Ruobin Gong        | 334 | Ryan Martin              | 335 | Salem Benferhat                    | 336 |
| Salma Smaoui       | 337 | Scott Ferson             | 338 | Seamus Bradley                     | 339 |
| Sebastian Maass    | 340 | Sebastien Destercke      | 341 | Ser Tong Quek                      | 342 |
| Serafin Moral      | 343 | Serena Doria             | 344 | Sergey Gurov                       | 345 |
| Shoumei Li         | 346 | Silja Renooij            | 347 | Silvia Muzzioli                    | 348 |
| Simon Blake        | 349 | Simon Marshall           | 350 | Simon Pittschmann                  | 351 |
| Stavros Lopatzidis | 352 | Stefan Arnborg           | 353 | Sten Andler                        | 354 |
| Stephen Broomell   | 355 | Steven Parkinson         | 356 | Sujoy Mukerji                      | 357 |
| Sun Yi             | 358 | Susana Montes            | 359 | Sven-Hendrik Lossin                | 360 |
| Svetlana Zatenko   | 361 | Sylvain Perron           | 362 | Tahani Maturi                      | 363 |
| Tathagata Basu     | 364 | Teddy Seidenfeld         | 365 | Teresa Piovesan                    | 366 |
| Terrence Fine      | 367 | Thiago Bueno             | 368 | Thierry Denoeux                    | 369 |
| Thijs van Ommen    | 370 | Thomas Augustin          | 371 | Thomas Bartos                      | 372 |
| Thomas Fetz        | 373 | Thomas Krak              | 374 | Thomas Lukasiewicz                 | 375 |
| Tom Sterkenburg    | 376 | Tomas Kroupa             | 377 | Tu Duong Le Duy                    | 378 |
| Tzur Karelitz      | 379 | Ugis Bickis              | 380 | Ullrika Sahlin                     | 381 |
| Vaclav Kratochvil  | 382 | Varun Dutt               | 383 | Veronica Biazzo                    | 384 |
| Veselka Boeva      | 385 | Victor Krymsky           | 386 | Victor Richmond Jose               | 387 |
| Vincent Fortin     | 388 | Vladislav Bina           | 389 | Volker Kraetschmer                 | 390 |
| Weiru Liu          | 391 | Wynn Stirling            | 392 | Xuecheng Liu                       | 393 |
| Xun Wang           | 394 | Yakov Ben-Haim           | 395 | Yonatan Carlos Carranza<br>Alarcon | 396 |
| Yongchuan Tang     | 397 | Yulia Zhuk               | 398 | Zoran Ognjanovic                   | 399 |

Table 5: IDs of cities in the collaboration network

| City                | ID  | City               | ID  | City              | ID  |
|---------------------|-----|--------------------|-----|-------------------|-----|
| Abu Dhabi           | 1   | Alicante           | 2   | Almeria           | 3   |
| Ames                | 4   | Amsterdam          | 5   | Auckland          | 6   |
| Badajoz             | 7   | Barcelona          | 8   | Bayreuth          | 9   |
| Beijing             | 10  | Belfast            | 11  | Belgrade          | 12  |
| Berlin              | 13  | Berne              | 14  | Bethune           | 15  |
| Bielefeld           | 16  | Binghamton         | 17  | Birmingham        | 18  |
| Bloomington         | 19  | Bologna            | 20  | Bremen            | 21  |
| Bristol             | 22  | Brussels           | 23  | Buenos Aires      | 24  |
| Bühl                | 25  | Caceres            | 26  | Cadarache         | 27  |
| Cadiz               | 28  | Cambridge          | 29  | Canberra          | 30  |
| Caracas             | 31  | Caruaru            | 32  | Catania           | 33  |
| Chatenay-Malabry    | 34  | Chieti             | 35  | Clamart           | 36  |
| Cleveland           | 37  | Compiègne          | 38  | Concord           | 39  |
| Coral Gables        | 40  | Davis              | 41  | Delft             | 42  |
| Durham (UK)         | 43  | Durham (US)        | 44  | Evanston          | 45  |
| Frankfurt (Main)    | 46  | Gaevle             | 47  | Galway            | 48  |
| Ghent               | 49  | Gijon              | 50  | Granada           | 51  |
| Graz                | 52  | Groningen          | 53  | Guangzhou         | 54  |
| Haifa               | 55  | Hangzhou           | 56  | Hanover           | 57  |
| Hong Kong           | 58  | Innsbruck          | 59  | Iowa City         | 60  |
| Ithaca              | 61  | Jinan              | 62  | Jindrichuv Hradec | 63  |
| Jouy-en-Josas       | 64  | Kingston upon Hull | 65  | Kongens Lyngby    | 66  |
| Lawrence            | 67  | Laxenburg          | 68  | Leeds             | 69  |
| Leiden              | 70  | Lens               | 71  | Leuven            | 72  |
| Limerick            | 73  | Liverpool          | 74  | Ljubljana         | 75  |
| Los Alamos          | 76  | Los Angeles        | 77  | Lower Hutt        | 78  |
| Lund                | 79  | Luxembourg         | 80  | Malaga            | 81  |
| Manchester          | 82  | Manno              | 83  | Milan             | 84  |
| Minneapolis         | 85  | Modena             | 86  | Montpellier       | 87  |
| Montreal            | 88  | Moscow             | 89  | Mostoles          | 90  |
| Munich              | 91  | Nantes             | 92  | Naples            | 93  |
| New Rochelle        | 94  | New York           | 95  | Newark            | 96  |
| Newcastle Upon Tyne | 97  | Novi Sad           | 98  | Orsay             | 99  |
| Ottawa              | 100 | Oviedo             | 101 | Oxford            | 102 |
| Padova              | 103 | Palaiseau          | 104 | Palermo           | 105 |
| Paris               | 106 | Pasadena           | 107 | Perugia           | 108 |
| Piscataway          | 109 | Pittsburgh         | 110 | Plovdiv           | 111 |
| Ponta Grossa        | 112 | Potsdam            | 113 | Prague            | 114 |
| Provo               | 115 | Raleigh            | 116 | Recife            | 117 |
| Rio De Janeiro      | 118 | Roma               | 119 | Rome              | 120 |
| Roskilde            | 121 | Rueil-Malmaison    | 122 | Saint Gallen      | 123 |
| Saint Petersburg    | 124 | Saint-Denis        | 125 | Saint-Etienne     | 126 |
| Sainte-Foy          | 127 | Salzburg           | 128 | San Diego         | 129 |
| Sand Hutton         | 130 | Santander          | 131 | Sao Paulo         | 132 |
| Saskatoon           | 133 | Setauket           | 134 | Siena             | 135 |
| Singapore           | 136 | Skovde             | 137 | Somerville        | 138 |
| Southampton         | 139 | St. Louis          | 140 | Stockholm         | 141 |
| Sundsvall           | 142 | Taganrog           | 143 | Tel Aviv          | 144 |



Table 5: IDs of cities in the collaboration network (cont.)

| City             | ID  | City              | ID  | City    | ID  |
|------------------|-----|-------------------|-----|---------|-----|
| Tempe            | 145 | Thiverval-Grignon | 146 | Thun    | 147 |
| Torino           | 148 | Toulouse          | 149 | Trieste | 150 |
| Troyes           | 151 | Tsukuba           | 152 | Ufa     | 153 |
| University Park  | 154 | Urbana-Champaign  | 155 | Utrecht | 156 |
| Vandoeuvre       | 157 | Varenes           | 158 | Vienna  | 159 |
| Villetaneuse     | 160 | Warwick           | 161 | Wemmel  | 162 |
| West Long Branch | 163 | York              | 164 | Zurich  | 165 |
